# Supplementary material for: Heterobimetallic complexes with MIII-(μ-OH)-MIIcores (MIII= Fe, Mn, Ga; MII= Ca, Sr, and Ba): structural, kinetic, and redox properties
Source: Royal Society of Chemistry journal article supplement (doi:10.1039/c2sc21400h), 2012-11-14
Supplement: c2sc21400h.pdf [file c2sc21400h.pdf]

## Supporting Information

### ***Heterobimetallic Complexes with $M^{III}$ -( $\mu$ -OH)- $M^{II}$ Cores ( $M^{III}$ = Fe, Ga, Mn; $M^{II}$ = Ca, Sr): Structural, Kinetic, and Redox Properties.***

Young Jun Park, Sarah A. Cook, Nathaniel S. Sickerman, Yohei Sano, Joseph W. Ziller  
and A. S. Borovik\*

Department of Chemistry, University of California-Irvine, 1102 Natural Science II,  
Irvine, CA 92697-2025

Email: aborovik@uci.edu

### **Contents**

|                        |            |
|------------------------|------------|
| <b>Crystallography</b> | <b>S2</b>  |
| <b>References</b>      | <b>S4</b>  |
| <b>Table S1</b>        | <b>S5</b>  |
| <b>Table S2</b>        | <b>S6</b>  |
| <b>Table S3</b>        | <b>S7</b>  |
| <b>Figure S1</b>       | <b>S8</b>  |
| <b>Figure S2</b>       | <b>S8</b>  |
| <b>Figure S3</b>       | <b>S9</b>  |
| <b>Figure S4</b>       | <b>S9</b>  |
| <b>Figure S5</b>       | <b>S10</b> |
| <b>Figure S6</b>       | <b>S11</b> |
| <b>Figure S7</b>       | <b>S12</b> |
| <b>Figure S8</b>       | <b>S12</b> |
| <b>Figure S9</b>       | <b>S13</b> |
| <b>Figure S10</b>      | <b>S14</b> |

## Crystallography

### General Methods

Single crystals were mounted on a glass fiber and transferred to a Bruker SMART APEX II diffractometer. The APEX2<sup>1</sup> program package was used to determine the unit-cell parameters and for data collection. The raw frame data was processed using SAINT<sup>2</sup> and SADABS<sup>3</sup> to yield the reflection data file. Subsequent calculations were carried out using the SHELXTL<sup>4</sup> program. The structures were solved by direct methods and refined on F<sup>2</sup> by full-matrix least-squares techniques. The analytical scattering factors<sup>5</sup> for neutral atoms were used throughout the analyses. Hydrogen atom H(7) was located from a difference-Fourier map and refined (x,y,z and U<sub>iso</sub>) with d(O-H) fixed at 0.85 Å. The remaining hydrogen atoms were included using a riding model.

**Structure of [15-crown-5]Ca<sup>II</sup>-(μ-OH)-Fe<sup>III</sup>MST]OTf.** A yellow crystal of approximate dimensions 0.18 x 0.23 x 0.33 mm was analyzed. There were no systematic absences or any diffraction symmetry other than the Friedel condition. The centrosymmetric triclinic space group *P*-1 was assigned and later determined to be correct. The fluorine atoms, oxygen atoms O(14) and O(15) and carbon atoms C(37), C(38) and C(40) were disordered and included using multiple components and partial site-occupancy-factors. Equivalent anisotropic thermal parameters were used for the fluorine atoms. There was one molecule of dichloromethane solvent present. Least-squares analysis yielded wR<sub>2</sub> = 0.1201 and Goof = 1.035 for 733 variables (1 restraint) refined against 13241 data (0.76 Å), R<sub>1</sub> = 0.0443 for those 11334 data with I > 2.0σ(I).

### Structure of [15-crown-5]Sr<sup>II</sup>-(μ-OH)-Fe<sup>III</sup>MST]OTf.

A yellow crystal of approximate dimensions 0.13 x 0.18 x 0.31 mm was analyzed. The diffraction symmetry was 2/*m* and the systematic absences were consistent with the monoclinic space group *P*2<sub>1</sub>/*c* that was later determined to be correct. The 15-crown-5 was disordered and included using multiple components, partial site-occupancy-factors and isotropic thermal parameters. There was one molecule of dichloromethane solvent present. At convergence, wR<sub>2</sub> = 0.1300 and Goof = 1.035 for 675 variables refined against 12345 data (0.78 Å), R<sub>1</sub> = 0.0472 for those 10487 data with I > 2.0σ(I).

**Structure of [15-crown-5]Sr<sup>II</sup>-(μ-OH)-Mn<sup>III</sup>MST]OTf.** A green crystal of approximate dimensions 0.21 x 0.31 x 0.41 mm was analyzed. There were no systematic absences or any diffraction symmetry other than the Friedel condition. The centrosymmetric triclinic space group *P*-1 was assigned and later determined to be correct. There were two molecules of dichloromethane solvent present. The triflate anion and the solvent chlorine atoms were disordered and included using multiple components and partial site-occupancy-factors. The triflate anion was refined as a rigid group. Isotropic thermal parameters were used for the carbon, fluorine and oxygen atoms associated with the triflate anion and for the chlorine atoms. Least-squares analysis yielded  $wR2 = 0.1434$  and  $Goof = 1.039$  for 674 variables (1 restraint) refined against 12276 data ( $0.80\text{\AA}$ ),  $R1 = 0.0530$  for those 11026 data with  $I > 2.0\sigma(I)$ .

**Structure of [15-crown-5]Ca<sup>II</sup>-(μ-OH)-Ga<sup>III</sup>MST].** A colorless crystal of approximate dimensions 0.28 x 0.33 x 0.39 mm was analyzed. There were no systematic absences or any diffraction symmetry other than the Friedel condition. The centrosymmetric triclinic space group *P*-1 was assigned and later determined to be correct. The fluorine atoms, carbon C(45) and oxygen atoms O(13), O(14) and O(15) were disordered and included using multiple components and partial site-occupancy-factors. Equivalent isotropic thermal parameters were used for the fluorine atoms and oxygen atoms associated with the triflate anion. There was one molecule of dichloromethane solvent present. Least-squares analysis yielded  $wR2 = 0.1304$  and  $Goof = 1.059$  for 672 variables (1 restraint) refined against 12505 data ( $0.78\text{\AA}$ ),  $R1 = 0.0469$  for those 11177 data with  $I > 2.0\sigma(I)$ .

Definitions:

$$wR2 = [\Sigma[w(F_o^2 - F_c^2)^2] / \Sigma[w(F_o^2)^2]]^{1/2}$$

$$R1 = \Sigma||F_o| - |F_c|| / \Sigma|F_o|$$

$Goof = S = [\Sigma[w(F_o^2 - F_c^2)^2] / (n-p)]^{1/2}$  where  $n$  is the number of reflections and  $p$  is the total number of parameters refined.

## References

1. APEX2 Version 2010.3-0, Bruker AXS, Inc.; Madison, WI 2010.
2. SAINT Version 7.68a, Bruker AXS, Inc.; Madison, WI 2009.
3. Sheldrick, G. M. SADABS, Version 2008/1, Bruker AXS, Inc.; Madison, WI 2008.
4. Sheldrick, G. M. SHELXTL, Version 2008/4, Bruker AXS, Inc.; Madison, WI 2008.
5. International Tables for X-Ray Crystallography 1992, Vol. C., Dordrecht: Kluwer Academic Publishers.

**Table S1.** Crystallographic Data and Structure Refinement Parameters for the  $M^{II}-(\mu-OH)-Fe^{III}$  Core Complexes

| Complex                              | [15-crown-5 $\supset$ Ca <sup>II</sup> -( $\mu$ -OH)-Fe <sup>III</sup> MST]OTf                                                       | [15-crown-5 $\supset$ Sr <sup>II</sup> -( $\mu$ -OH)-Fe <sup>III</sup> MST]OTf                                     |
|--------------------------------------|--------------------------------------------------------------------------------------------------------------------------------------|--------------------------------------------------------------------------------------------------------------------|
| Formula                              | C <sub>44</sub> H <sub>66</sub> CaF <sub>3</sub> FeN <sub>4</sub> O <sub>15</sub> S <sub>4</sub><br>•CH <sub>2</sub> Cl <sub>2</sub> | C <sub>45</sub> H <sub>68</sub> Cl <sub>2</sub> F <sub>3</sub> Fe N <sub>4</sub> O <sub>15</sub> S <sub>4</sub> Sr |
| Formula weight                       | 1257.10                                                                                                                              | 1304.64                                                                                                            |
| Crystal system                       | Triclinic                                                                                                                            | Monoclinic                                                                                                         |
| Space group                          | $P\bar{1}$                                                                                                                           | $P2_1/c$                                                                                                           |
| a (Å)                                | 14.2376(5)                                                                                                                           | 8.7949(3)                                                                                                          |
| b (Å)                                | 14.5557(5)                                                                                                                           | 28.7099(11)                                                                                                        |
| c (Å)                                | 16.0245(6)                                                                                                                           | 22.4440(9)                                                                                                         |
| $\alpha$ (°)                         | 112.0349(4)                                                                                                                          | 90                                                                                                                 |
| $\beta$ (°)                          | 96.1392(4)                                                                                                                           | 98.6131(5)                                                                                                         |
| $\gamma$ (°)                         | 107.9824(4)                                                                                                                          | 90                                                                                                                 |
| Volume (Å <sup>3</sup> )             | 2832.94(17)                                                                                                                          | 5603.2(4)                                                                                                          |
| Z                                    | 2                                                                                                                                    | 4                                                                                                                  |
| $\delta_{calc}$ (Mg/m <sup>3</sup> ) | 1.474                                                                                                                                | 1.547                                                                                                              |
| Goodness-of-fit                      | 1.035                                                                                                                                | 1.035                                                                                                              |
| R1                                   | 0.0443                                                                                                                               | 0.0472                                                                                                             |
| wR2                                  | 0.1145                                                                                                                               | 0.1234                                                                                                             |

**Table S2.** Crystallographic Data and Structure Refinement Parameters for the  $M^{II}-(\mu-OH)-M^{III}$  Core Complexes

| Complex                              | [15-crown-5 $\supset$ Sr <sup>II</sup> -( $\mu$ -OH)-Mn <sup>III</sup> MST]OTf                                    | [15-crown-5 $\supset$ Ca <sup>II</sup> -( $\mu$ -OH)-Ga <sup>III</sup> MST]                                      |
|--------------------------------------|-------------------------------------------------------------------------------------------------------------------|------------------------------------------------------------------------------------------------------------------|
| Formula                              | C <sub>46</sub> H <sub>70</sub> Cl <sub>4</sub> F <sub>3</sub> MnN <sub>4</sub> O <sub>15</sub> S <sub>4</sub> Sr | C <sub>45</sub> H <sub>68</sub> CaCl <sub>2</sub> F <sub>3</sub> GaN <sub>4</sub> O <sub>15</sub> S <sub>4</sub> |
| Formula weight                       | 1388.66                                                                                                           | 1270.97                                                                                                          |
| Crystal system                       | Triclinic                                                                                                         | Triclinic                                                                                                        |
| Space group                          | $P\bar{1}$                                                                                                        | $P\bar{1}$                                                                                                       |
| a (Å)                                | 13.9061(7)                                                                                                        | 14.3885(5)                                                                                                       |
| b (Å)                                | 15.1055(8)                                                                                                        | 14.7196(5)                                                                                                       |
| c (Å)                                | 16.2620(9)                                                                                                        | 15.8403(6)                                                                                                       |
| $\alpha$ (°)                         | 68.7445(6)                                                                                                        | 112.8012(4)                                                                                                      |
| $\beta$ (°)                          | 75.3429(6)                                                                                                        | 97.8526(4)                                                                                                       |
| $\gamma$ (°)                         | 74.3805(6)                                                                                                        | 106.3846(4)                                                                                                      |
| Volume (Å <sup>3</sup> )             | 3019.7(3)                                                                                                         | 2850.07(18)                                                                                                      |
| Z                                    | 2                                                                                                                 | 2                                                                                                                |
| $\delta_{calc}$ (Mg/m <sup>3</sup> ) | 1.527                                                                                                             | 1.481                                                                                                            |
| Goodness-of-fit                      | 1.039                                                                                                             | 1.059                                                                                                            |
| R1                                   | 0.0530                                                                                                            | 0.0469                                                                                                           |
| wR2                                  | 0.1392                                                                                                            | 0.1264                                                                                                           |

**Table S3.** Selected Metrical Parameters for the [Sr<sup>II</sup>(OH)-Mn<sup>III</sup>]<sup>+</sup> Complex.

| <b>Bond Distances (Å)</b>  |            |
|----------------------------|------------|
| Mn1—N1                     | 2.049(3)   |
| Mn1—N2                     | 2.057(3)   |
| Mn1—N3                     | 2.090(3)   |
| Mn1—N4                     | 2.042(3)   |
| Mn1—O7                     | 1.826(2)   |
| O7...O5                    | 2.664(6)   |
| Sr1—O7                     | 2.430(2)   |
| Sr1...O1                   | 2.503(2)   |
| Sr1...O3                   | 2.482(2)   |
| Mn1...Sr1                  | 3.897(2)   |
| Avg Sr1—O <sub>crown</sub> | 2.640(2)   |
| d[Mn—N <sub>eq</sub> ]     | 0.301      |
| d[M1—O <sub>crown</sub> ]  | 1.308      |
| <b>Bond Angles (°)</b>     |            |
| O7-Mn1-N1                  | 176.02(11) |
| O7-Mn1-N2                  | 97.68(11)  |
| O7-Mn1-N3                  | 102.74(11) |
| O7-Mn1-N4                  | 95.43(11)  |
| N1-Mn1-N2                  | 82.76(11)  |
| N1-Mn1-N3                  | 80.84(11)  |
| N1-Mn1-N4                  | 81.18(11)  |
| N2-Mn1-N3                  | 107.40(12) |
| N3-Mn1-N4                  | 119.87(12) |
| N2-Mn1-N4                  | 126.32(12) |
| Mn1-O7-Sr1                 | 132.09(12) |
| τ value                    | 0.828      |

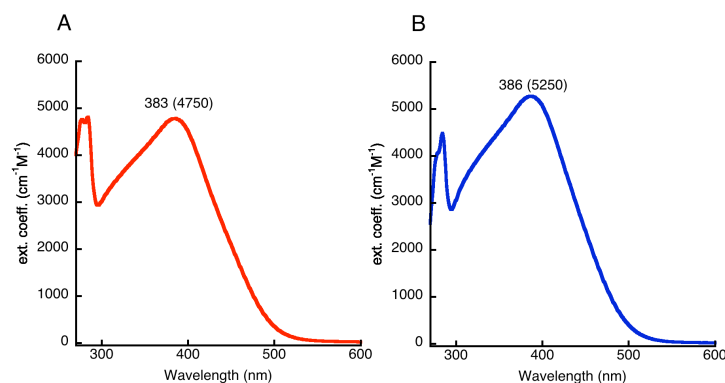

**Figure S1.** UV/Vis spectra for A: [15-crown-5⊃Ca<sup>II</sup>-(μ-OH)-Fe<sup>III</sup>MST]<sup>+</sup> and B: [15-crown-5⊃Sr<sup>II</sup>-(μ-OH)-Fe<sup>III</sup>MST]<sup>+</sup>. The measurements were done in DCM at room temperature.

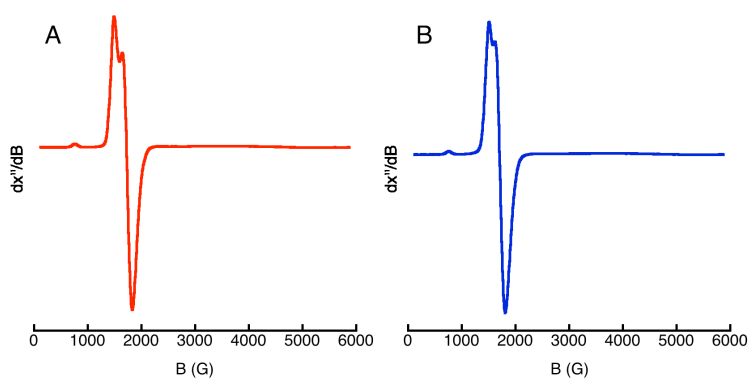

**Figure S2.** EPR spectra for A: [15-crown-5⊃Ca<sup>II</sup>-(μ-OH)-Fe<sup>III</sup>MST]<sup>+</sup> and B: [15-crown-5⊃Sr<sup>II</sup>-(μ-OH)-Fe<sup>III</sup>MST]<sup>+</sup>. The measurements were done in DCM at 4K.



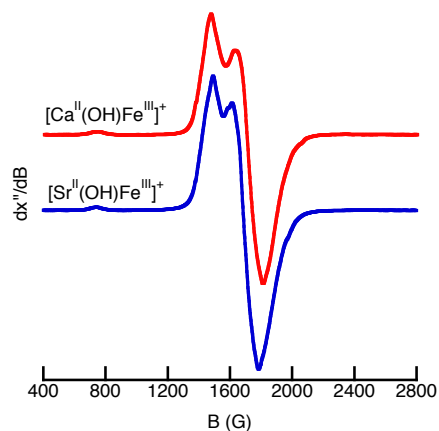

**Figure S3.** Stack plot of EPR spectra for  $[\text{15-crown-5}\supset\text{Ca}^{\text{II}}-(\mu\text{-OH})\text{-Fe}^{\text{III}}\text{MST}]^+$  and  $[\text{15-crown-5}\supset\text{Sr}^{\text{II}}-(\mu\text{-OH})\text{-Fe}^{\text{III}}\text{MST}]^+$ .

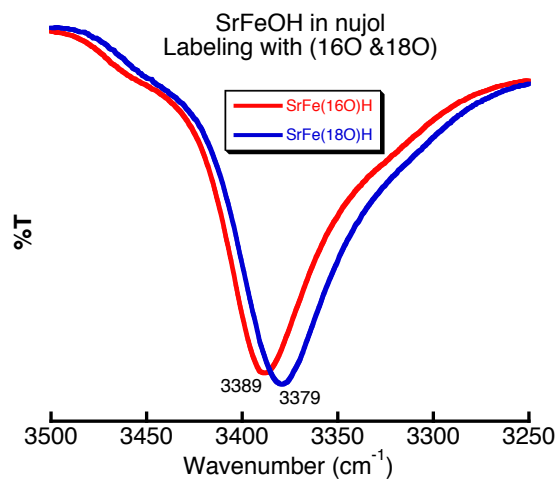

**Figure S4.** FTIR spectra of  $[\text{15-crown-5}\supset\text{Sr}^{\text{II}}-(\mu\text{-}^{16}\text{OH})\text{-Fe}^{\text{III}}\text{MST}]^+$  (red) and  $[\text{15-crown-5}\supset\text{Sr}^{\text{II}}-(\mu\text{-}^{18}\text{OH})\text{-Fe}^{\text{III}}\text{MST}]^+$  (blue) in Nujol.

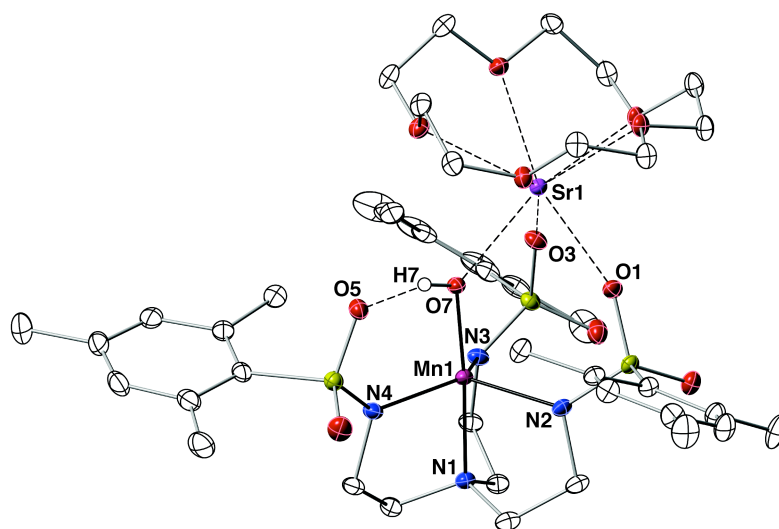

**Figure S5.** Thermal ellipsoid diagram depicting the molecular structure of [Sr<sup>II</sup>(OH)Mn<sup>III</sup>]<sup>+</sup>. Ellipsoids are drawn at the 50% probability level and only the hydroxo hydrogen atom is shown for clarity.

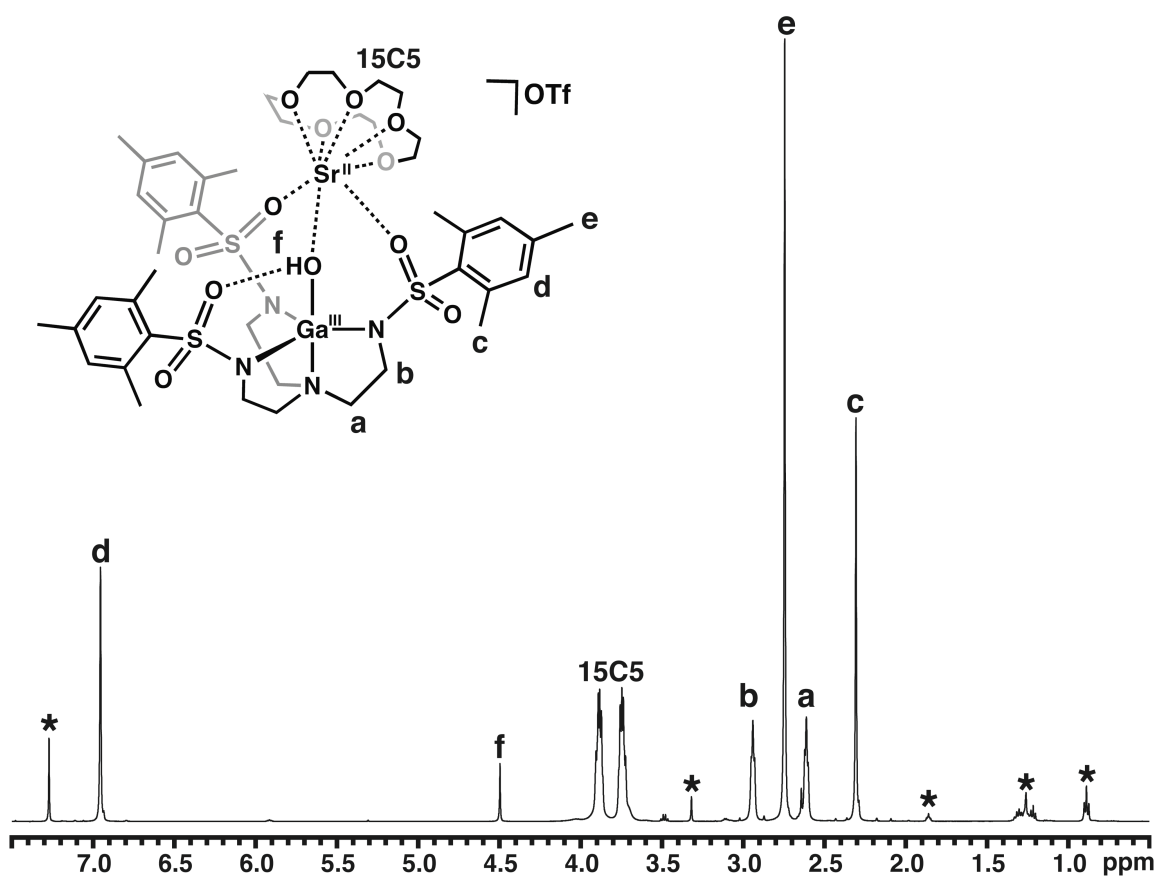

**Figure S6.**  $^1\text{H}$  NMR spectrum of  $[\text{Sr}^{\text{II}}(\text{OH})\text{Ga}^{\text{III}}]^+$  in  $\text{CDCl}_3$  at 298 K. Asterisks denote residual solvent peaks.

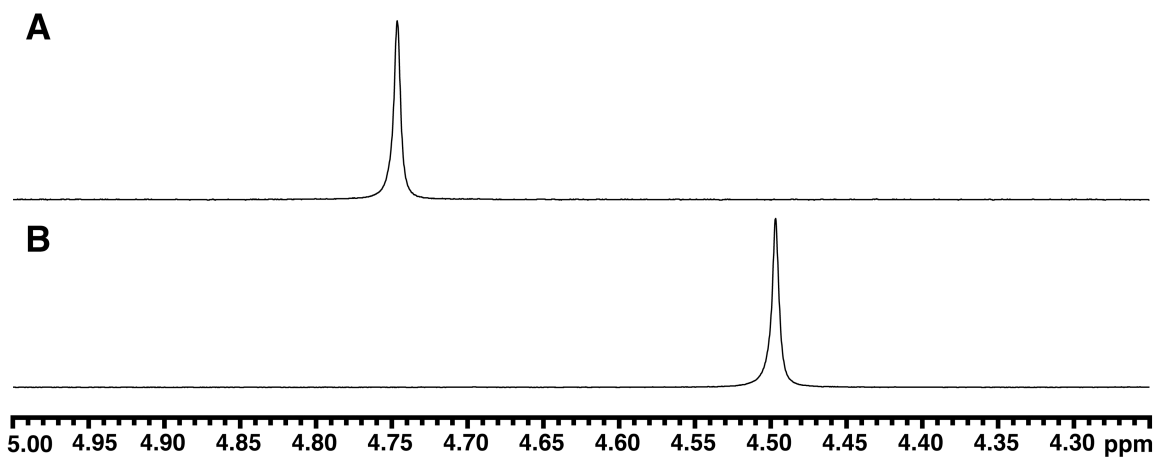

**Figure S7.** Overlay of  $^1\text{H}$  NMR spectra of  $[\text{Ca}^{\text{II}}(\text{OH})\text{Ga}^{\text{III}}]^+$  (A) and  $[\text{Sr}^{\text{II}}(\text{OH})\text{Ga}^{\text{III}}]^+$  (B) in  $\text{CDCl}_3$  at 298 K.

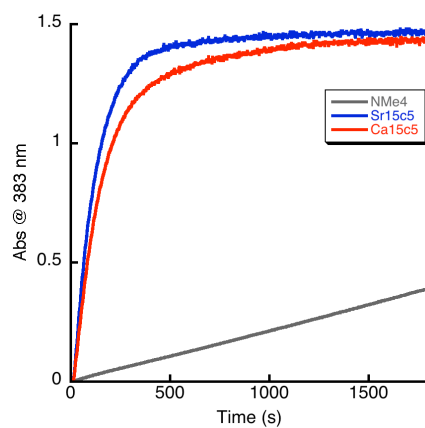

**Figure S8.** Time-course profiles for the reaction of  $[\text{Fe}^{\text{II}}\text{MST}]^-$  and  $\text{O}_2$  in the presence of  $[\text{NMe}_4]^+$ , 3 equiv of  $\text{Sr}(\text{OTf})_2/15\text{-crown-5}$ , and 3 equiv of  $\text{Ca}(\text{OTf})_2/15\text{-crown-5}$ . Reactions were done in  $\text{CH}_2\text{Cl}_2$  at  $20^\circ\text{C}$ .

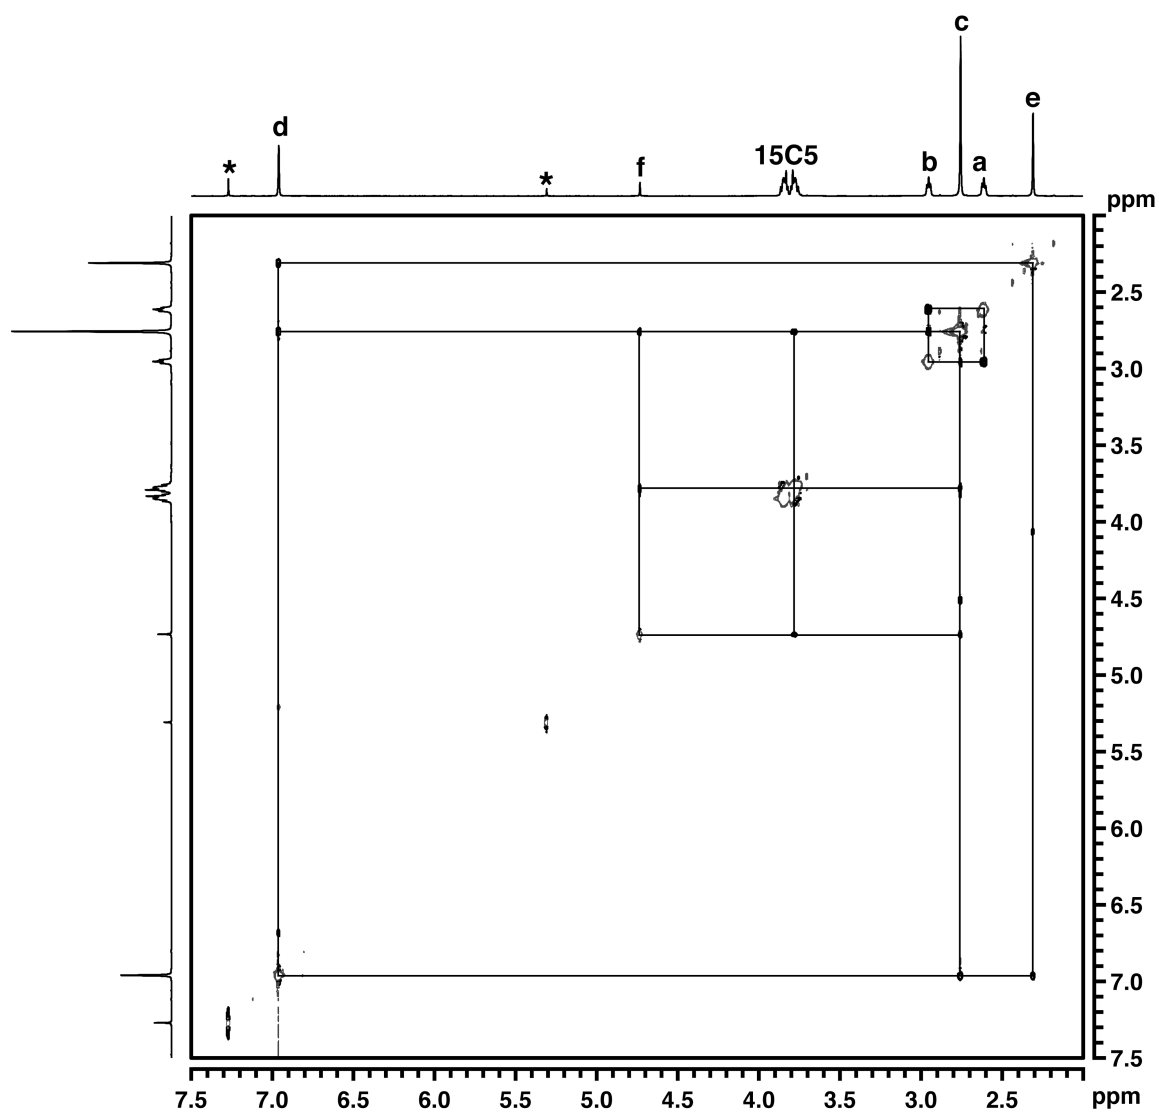

**Figure S9.** Full  $^1\text{H}$  NOESY NMR spectrum of  $[\text{Ca}^{\text{II}}(\text{OH})\text{Ga}^{\text{III}}]^+$  in  $\text{CDCl}_3$  at 298 K. Asterisks denote residual solvent peaks, and the drawn lines indicate NOE interactions.

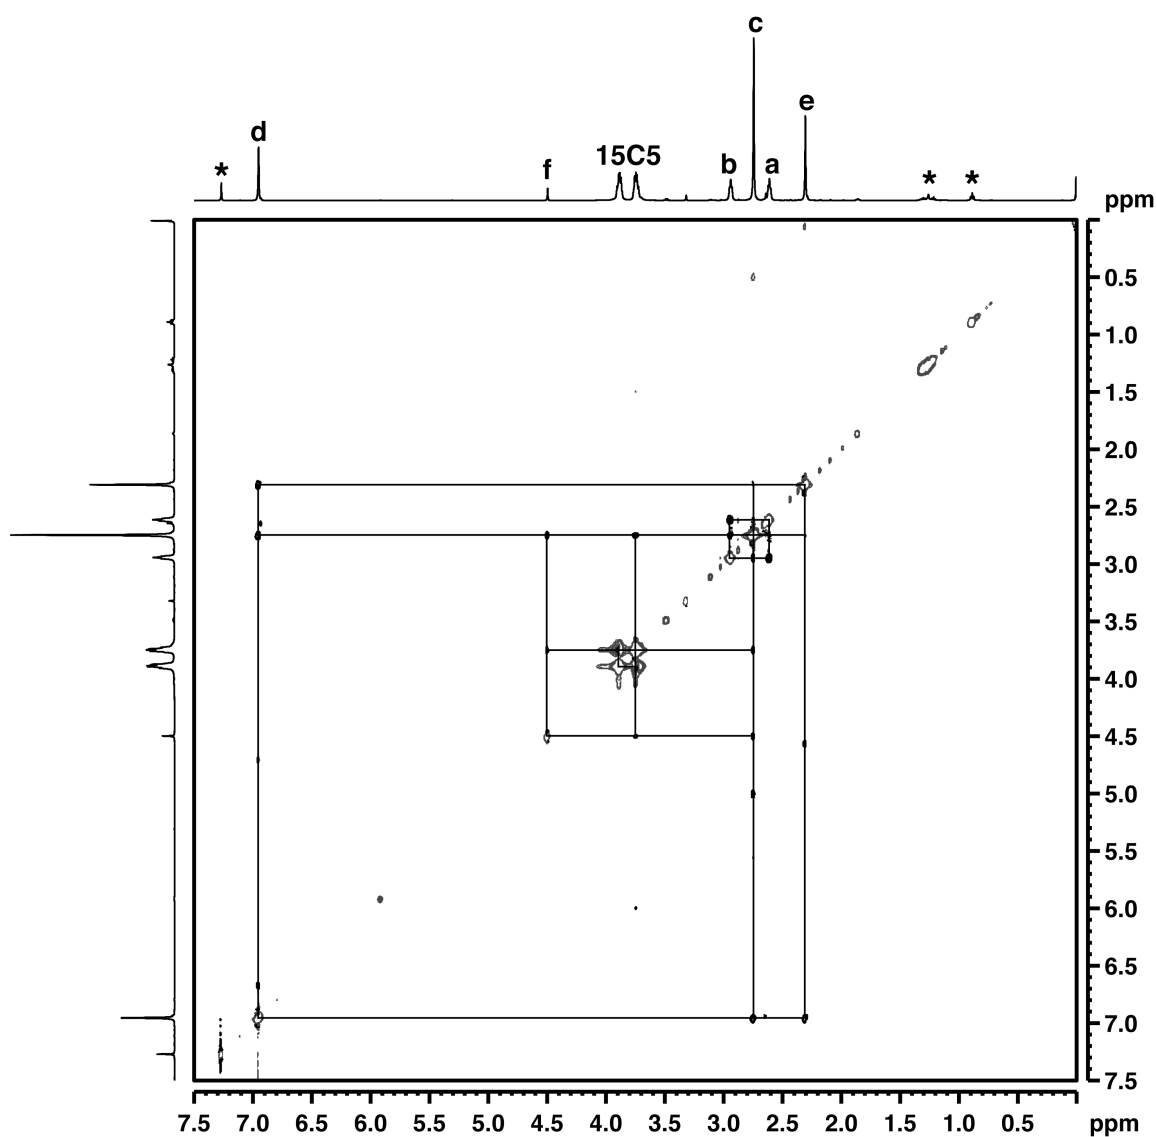

**Figure S10.**  $^1\text{H}$  NOESY NMR spectrum of  $[\text{Sr}^{\text{II}}(\text{OH})\text{Ga}^{\text{III}}]^+$  in  $\text{CDCl}_3$  at 298 K. Asterisks denote residual solvent peaks, and the drawn lines indicate NOE interactions.
